# Annals of Oncology

Official Journal of the  
European Society for Medical Oncology

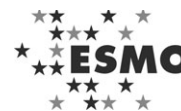

## Volume 17, 2006 Supplement 8

Cancer Initiatives in Developing Countries

30 October 2005: Paris, France

### introduction

Introduction

*D. J. Kerr*

viii5

The rising burden of cancer in the developing world

*P. Kanavos*

viii15

Cancer initiatives in developing countries

*H. Mellstedt*

viii24

Cancer initiatives in Sudan

*H. M. A. Hamad*

viii32

Cancer diagnosis and telemedicine: a case study from Cambodia

*J. Kvedar, P. J. Heinzelmann & G. Jacques*

viii37

Ongoing challenges of a global international patient assistance program

*S. Lassarat & S. Jootar*

viii43

Perceptions of cancer in developing countries

*J. Saba*

viii47

### symposium articles

Cancer in developing countries: challenges and solutions

*A. V. Reeler & H. Mellstedt*

viii7

World Health Organization cancer priorities in developing countries

*T. Ngoma*

viii9
